# Supplementary material for: Metabarcoding Analysis of the Bacterial and Fungal Communities during the Maturation of Preparation 500, Used in Biodynamic Agriculture, Suggests a Rational Link between Horn and Manure
Source: Preprints.org preprint supplement (doi:10.20944/preprints202008.0727.v1), 2020-08-31
Supplement: Supplementary file 1 [file supplementary]

**Supplementary Information for:**

**Metabarcoding analysis of the bacterial and fungal communities during the maturation of Preparation 500, used in biodynamic agriculture, suggests a rational link between horn and manure.**

Marina Zanardo<sup>1</sup>, Matteo Giannattasio<sup>1</sup>, Gaurav Sablok<sup>2</sup>, Massimo Pindo<sup>2</sup>, Nicola La Porta<sup>2,3</sup>, Michele Lorenzetti<sup>4</sup>, Carlo Noro<sup>4</sup>, Piergiorgio Stevanato<sup>1</sup>, Giuseppe Concheri<sup>1</sup> and Andrea Squartini<sup>1\*</sup>

<sup>1</sup>Department of Agronomy, Animals, Natural Resources and Environment - DAFNAE. University of Padua, Viale dell'Università 16, 35020 Legnaro (Padova), Italy.

<sup>2</sup>Research and Innovation Centre, Fondazione Edmund Mach (FEM), Via Mach 1, 38010 S. Michele all'Adige, Trento, Italy

<sup>3</sup>MOUNTFOR Project Centre, European Forest Institute, Via E. Mach 1, 38010 San Michele all'Adige, Trento, Italy

<sup>4</sup>Associazione Culturale Professione Biodinamica, Via Valle Fredda 31, 00030, Labico (RM), Italy

\*Corresponding author: phone ++39 0498272923, fax ++39 0498272929

E-mail: [squart@unipd.it](mailto:squart@unipd.it)

| <b>16S</b> | M0a   | M0b   | M0c   | 40a   | 40b   | 40c   | 85a   | 85b   | 85c   | 150ia | 150ib | 150ic | 150oa | 150ob | 150oc | SBda  | SBdb  | SBdc |
|------------|-------|-------|-------|-------|-------|-------|-------|-------|-------|-------|-------|-------|-------|-------|-------|-------|-------|------|
| M0a        |       |       |       |       |       |       |       |       |       |       |       |       |       |       |       |       |       |      |
| M0b        | 0,295 |       |       |       |       |       |       |       |       |       |       |       |       |       |       |       |       |      |
| M0c        | 0,354 | 0,328 |       |       |       |       |       |       |       |       |       |       |       |       |       |       |       |      |
| 40a        | 0,534 | 0,497 | 0,518 |       |       |       |       |       |       |       |       |       |       |       |       |       |       |      |
| 40b        | 0,546 | 0,521 | 0,560 | 0,282 |       |       |       |       |       |       |       |       |       |       |       |       |       |      |
| 40c        | 0,556 | 0,529 | 0,508 | 0,268 | 0,251 |       |       |       |       |       |       |       |       |       |       |       |       |      |
| 85a        | 0,668 | 0,655 | 0,630 | 0,319 | 0,382 | 0,326 |       |       |       |       |       |       |       |       |       |       |       |      |
| 85b        | 0,659 | 0,647 | 0,659 | 0,376 | 0,331 | 0,333 | 0,275 |       |       |       |       |       |       |       |       |       |       |      |
| 85c        | 0,701 | 0,668 | 0,652 | 0,361 | 0,351 | 0,331 | 0,262 | 0,279 |       |       |       |       |       |       |       |       |       |      |
| 150ia      | 0,760 | 0,697 | 0,718 | 0,449 | 0,459 | 0,442 | 0,395 | 0,440 | 0,401 |       |       |       |       |       |       |       |       |      |
| 150ib      | 0,718 | 0,690 | 0,692 | 0,445 | 0,375 | 0,411 | 0,384 | 0,327 | 0,376 | 0,323 |       |       |       |       |       |       |       |      |
| 150ic      | 0,697 | 0,653 | 0,637 | 0,407 | 0,396 | 0,354 | 0,369 | 0,368 | 0,360 | 0,314 | 0,286 |       |       |       |       |       |       |      |
| 150oa      | 0,731 | 0,738 | 0,682 | 0,465 | 0,453 | 0,421 | 0,349 | 0,355 | 0,375 | 0,310 | 0,308 | 0,348 |       |       |       |       |       |      |
| 150ob      | 0,771 | 0,712 | 0,704 | 0,484 | 0,507 | 0,469 | 0,381 | 0,439 | 0,415 | 0,385 | 0,331 | 0,338 | 0,313 |       |       |       |       |      |
| 150oc      | 0,794 | 0,745 | 0,755 | 0,484 | 0,500 | 0,448 | 0,383 | 0,394 | 0,423 | 0,324 | 0,358 | 0,340 | 0,315 | 0,333 |       |       |       |      |
| SBda       | 0,906 | 0,905 | 0,885 | 0,794 | 0,791 | 0,813 | 0,732 | 0,707 | 0,735 | 0,758 | 0,721 | 0,751 | 0,705 | 0,695 | 0,699 |       |       |      |
| SBdb       | 0,901 | 0,908 | 0,881 | 0,805 | 0,814 | 0,805 | 0,756 | 0,697 | 0,753 | 0,752 | 0,700 | 0,733 | 0,695 | 0,656 | 0,671 | 0,330 |       |      |
| SBdc       | 0,909 | 0,901 | 0,867 | 0,781 | 0,808 | 0,812 | 0,745 | 0,709 | 0,765 | 0,771 | 0,717 | 0,751 | 0,718 | 0,703 | 0,684 | 0,301 | 0,270 |      |

**Fig. S1. Whittaker beta diversity pairwise distance matrix of the bacterial community data.** M0: manure time zero; 40: sampling at time 40 days, 85: sampling at time 85 days; 150i: sampling at 150 days, inner core; 150o: sampling at 150 days, outer layer; SBd: soil of the Biodynamic farm. The three replicates are distinguished by the ending letters a,b,c. The color-based conditional formatting from green to red depicts the degrees of distance, where dark green indicates less distant and dark red indicates more distant communities.

| ITS   | M0a   | M0b   | M0c   | 40a   | 40b   | 40c   | 85a   | 85b   | 85c   | 150ia | 150ib | 150ic | 150oa | 150ob | 150oc | SBda  | SBdb  | SBdc |
|-------|-------|-------|-------|-------|-------|-------|-------|-------|-------|-------|-------|-------|-------|-------|-------|-------|-------|------|
| M0a   |       |       |       |       |       |       |       |       |       |       |       |       |       |       |       |       |       |      |
| M0b   | 0,254 |       |       |       |       |       |       |       |       |       |       |       |       |       |       |       |       |      |
| M0c   | 0,255 | 0,262 |       |       |       |       |       |       |       |       |       |       |       |       |       |       |       |      |
| 40a   | 0,489 | 0,529 | 0,497 |       |       |       |       |       |       |       |       |       |       |       |       |       |       |      |
| 40b   | 0,405 | 0,432 | 0,367 | 0,359 |       |       |       |       |       |       |       |       |       |       |       |       |       |      |
| 40c   | 0,388 | 0,447 | 0,417 | 0,258 | 0,308 |       |       |       |       |       |       |       |       |       |       |       |       |      |
| 85a   | 0,439 | 0,479 | 0,436 | 0,447 | 0,395 | 0,347 |       |       |       |       |       |       |       |       |       |       |       |      |
| 85b   | 0,425 | 0,450 | 0,423 | 0,389 | 0,333 | 0,303 | 0,316 |       |       |       |       |       |       |       |       |       |       |      |
| 85c   | 0,457 | 0,444 | 0,410 | 0,484 | 0,413 | 0,395 | 0,388 | 0,351 |       |       |       |       |       |       |       |       |       |      |
| 150ia | 0,445 | 0,494 | 0,467 | 0,400 | 0,376 | 0,351 | 0,310 | 0,338 | 0,400 |       |       |       |       |       |       |       |       |      |
| 150ib | 0,398 | 0,387 | 0,409 | 0,438 | 0,368 | 0,377 | 0,323 | 0,319 | 0,354 | 0,301 |       |       |       |       |       |       |       |      |
| 150ic | 0,341 | 0,392 | 0,368 | 0,412 | 0,358 | 0,367 | 0,376 | 0,353 | 0,409 | 0,291 | 0,276 |       |       |       |       |       |       |      |
| 150oa | 0,358 | 0,410 | 0,349 | 0,474 | 0,318 | 0,339 | 0,350 | 0,328 | 0,390 | 0,309 | 0,279 | 0,269 |       |       |       |       |       |      |
| 150ob | 0,395 | 0,432 | 0,372 | 0,487 | 0,424 | 0,407 | 0,398 | 0,416 | 0,452 | 0,381 | 0,360 | 0,311 | 0,259 |       |       |       |       |      |
| 150oc | 0,406 | 0,420 | 0,406 | 0,455 | 0,424 | 0,369 | 0,362 | 0,369 | 0,400 | 0,394 | 0,343 | 0,348 | 0,338 | 0,324 |       |       |       |      |
| SBda  | 0,421 | 0,441 | 0,401 | 0,632 | 0,521 | 0,569 | 0,506 | 0,465 | 0,500 | 0,517 | 0,416 | 0,410 | 0,438 | 0,425 | 0,391 |       |       |      |
| SBdb  | 0,465 | 0,515 | 0,472 | 0,592 | 0,541 | 0,538 | 0,514 | 0,481 | 0,484 | 0,488 | 0,429 | 0,434 | 0,452 | 0,427 | 0,439 | 0,252 |       |      |
| SBdc  | 0,492 | 0,510 | 0,477 | 0,643 | 0,587 | 0,617 | 0,507 | 0,513 | 0,467 | 0,519 | 0,468 | 0,450 | 0,470 | 0,432 | 0,420 | 0,284 | 0,289 |      |

**Fig. S2. Whittaker beta diversity pairwise distance matrix of the fungal community data.** M0: manure time zero; 40: sampling at time 40 days, 85: sampling at time 85 days; 150i: sampling at 150 days, inner core; 150o: sampling at 150 days, outer layer; SBd: soil of the Biodynamic farm. The three replicates are distinguished by the ending letters a,b,c. The color-based conditional formatting from green to red depicts the degrees of distance as in Fig. S3.

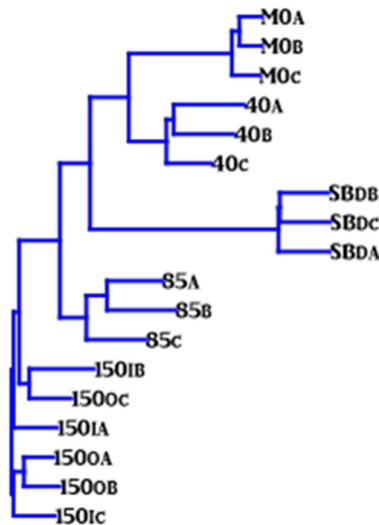

**Fig. S3. Cluster analysis ordination of the bacterial data.** The Neighbor Joining dendrogram based on the Bray-Curtis dissimilarity of the 16S amplicons data is shown.

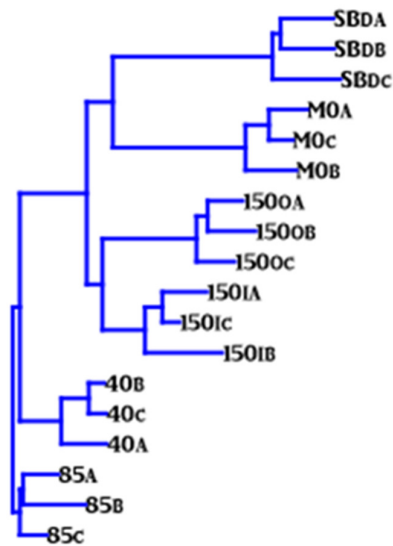

**Fig. S4. Cluster analysis ordination of the fungal data.** The Neighbor Joining dendrogram based on the Bray Curtis distances of the ITS amplicons data is shown.

| Sample | Fungal genera | Bacterial genera |
|--------|---------------|------------------|
| M0a    | 89            | 62               |
| M0b    | 96            | 60               |
| M0c    | 99            | 68               |
| 40a    | 44            | 127              |
| 40b    | 59            | 132              |
| 40c    | 45            | 127              |
| 85a    | 50            | 143              |
| 85b    | 64            | 155              |
| 85c    | 84            | 139              |
| 150ia  | 66            | 138              |
| 150ib  | 77            | 172              |
| 150ic  | 75            | 136              |
| 150oa  | 70            | 146              |
| 150ob  | 73            | 148              |
| 150oc  | 66            | 152              |
| SBda   | 108           | 193              |
| SBdb   | 98            | 201              |
| SBdc   | 96            | 202              |

**Table S1. Bacterial and fungal genera numbers recorded at different time points.** M0: manure at time zero (faecal material); 40, 85 150: material rescued after 40, 85, 150 days from burying respectively. For the endpoint analysis of the mature material (150 days) the sampling from the inner core (i) was distinguished from that of the outer portion of the cone (o), closer to the horn shell. SBd: Soil of the biodynamic agricultural farm from which the manure originates and in which the final product is used. Letters a,b,c indicate the three biological replicates.

|                             | M0      | 40      | 85      | 150i    | 150o   | SBd    |
|-----------------------------|---------|---------|---------|---------|--------|--------|
| <b>Bacteria Simpson 1-D</b> | 0.9152  | 0.9175  | 0.9629  | 0.9361  | 0.9357 | 0.9802 |
| <b>Bacteria Shannon H</b>   | 2.918   | 3.543   | 3.988   | 3.689   | 3.658  | 4.548  |
| <b>Bacteria Evenness</b>    | 0.1908  | 0.1869  | 0.2593  | 0.1795  | 0.1709 | 0.3222 |
| <b>Fungi Simpson 1-D</b>    | 0.7798  | 0.5846  | 0.6776  | 0.7981  | 0.8903 | 0.896  |
| <b>Fungi Shannon H</b>      | 2.191   | 1.311   | 1.783   | 2.106   | 2.558  | 2.841  |
| <b>Fungi Evenness</b>       | 0.06527 | 0.04946 | 0.05667 | 0.07604 | 0.1207 | 0.1181 |

**Table S2. Ecological indexes of diversity and evenness.** Input data: abundance matrix featuring the means of the three replicates for each OTU detected. M0: manure time zero; 40: sampling at time 40 days, 85: sampling at time 85 days; 150i: sampling at 150 days, inner core; 150o: sampling at 150 days, outer layer; SBd: soil of the Biodynamic farm.

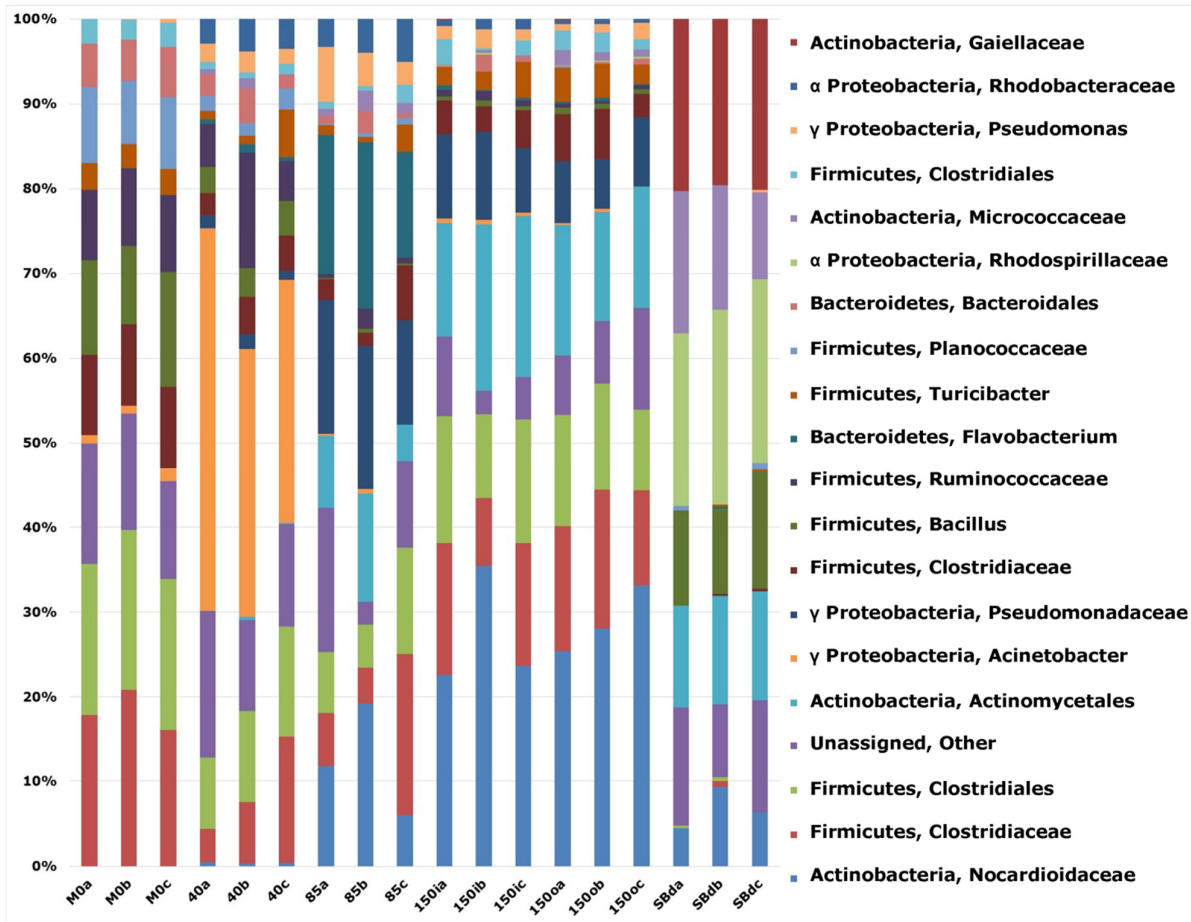

**Fig. S5. Bacterial first 20 most abundant taxa.** The nomenclature reported shows the Phylum (or the Class for Proteobacteria) followed by the deepest rank (L6) achievable by the annotation procedure.

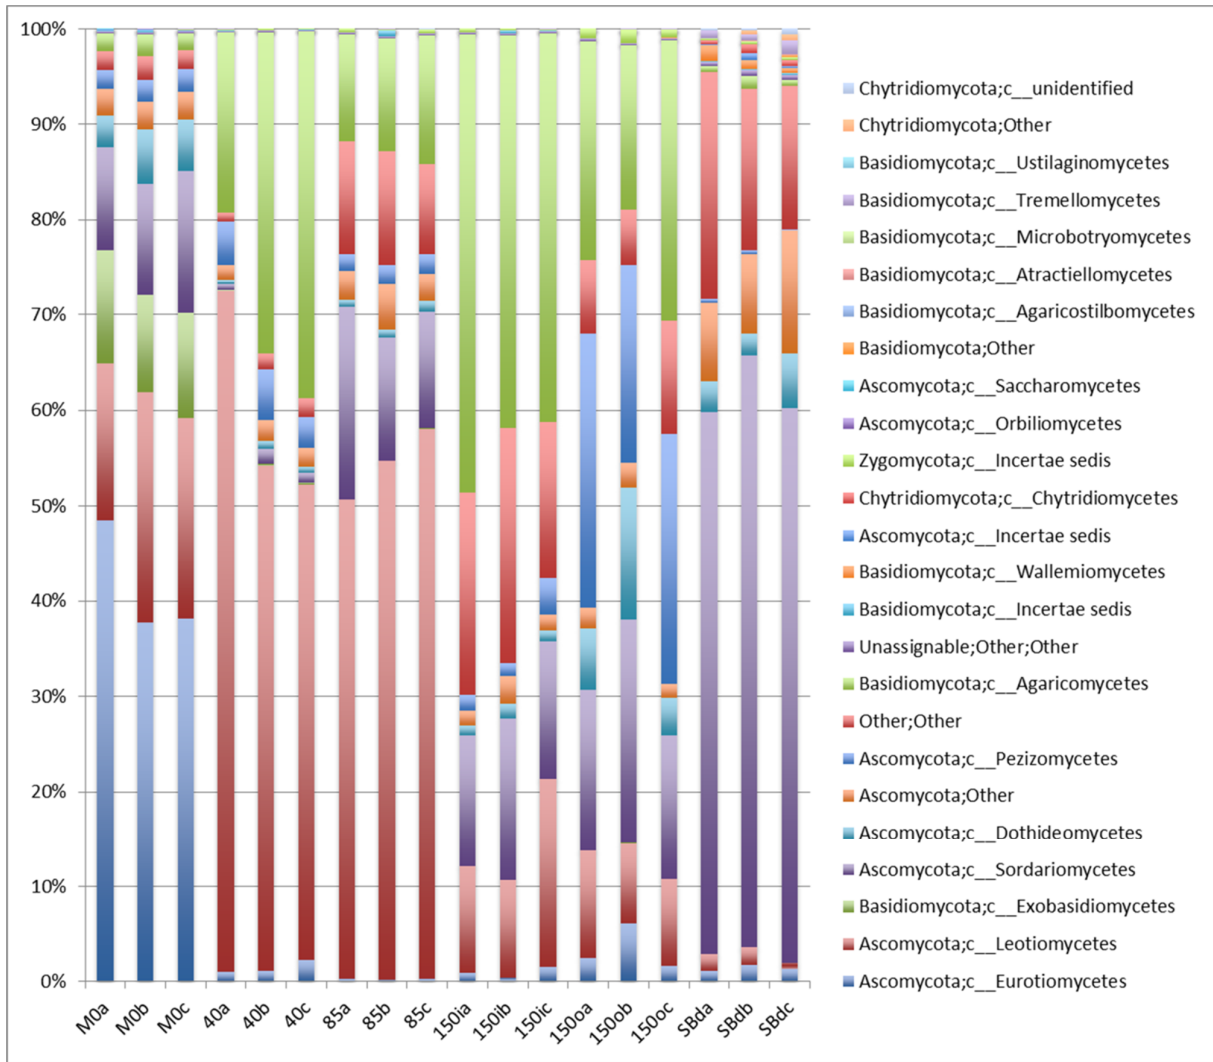

**Fig. S6. Fungal classes observed.** their relative percent contribution to each time point community and to the soil of the project's farm (SBd) is shown.

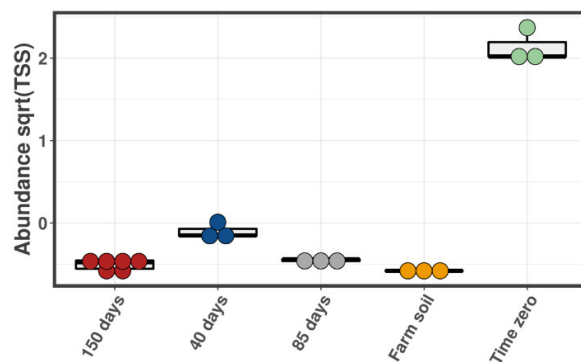

**Fig. S7. Onygenales fungi abundance comparison at different timepoints.** The corresponding anova p value for the order resulted =  $7.8 \times 10^{-14}$ . The units on the Y axis are abundance values after square root transformation of their data (TSS= total sum of squares).
